# Supplementary material
Source: HighWire-hosted journal article supplement (https://jnis.bmj.com/content/14/9/863)
Supplement: inline-supplementary-material-1 [file inline-supplementary-material-1.pdf]

**Supplemental Table 1**

| <b>Hospital</b> | <b>BGC+SR alone approach<br/>(n=273, 66.6%)</b> | <b>BGC+DAC+SR approach<br/>(n=128, 33.4%)</b> |
|-----------------|-------------------------------------------------|-----------------------------------------------|
| #1              | 19 (31.7)                                       | 41 (68.3)                                     |
| #2              | 9 (14.5)                                        | 53 (85.5)                                     |
| #3              | 117 (100)                                       | 0 (0)                                         |
| #4              | 4 (26.7)                                        | 11 (73.3)                                     |
| #5              | 1 (16.7)                                        | 5 (83.3)                                      |
| #6              | 101 (97.1)                                      | 3 (2.9)                                       |
| #7              | 15 (68.2)                                       | 7 (31.8)                                      |
| #8              | 7 (46.7)                                        | 8 (53.3)                                      |

**Supplemental Table 1.** Balloon guiding catheter techniques according to the recruiting centers.

Supplemental Table 2

| Device                             | BGC+SR alone approach<br>(n=273, 66.6%) | BGC+DAC+SR approach<br>(n=128, 33.4%) |
|------------------------------------|-----------------------------------------|---------------------------------------|
| <b>Aspiration catheter</b>         |                                         |                                       |
| Ace (64, 68)                       | None                                    | 8 (6.3)                               |
| Catalyst (5, 6, 7)                 | None                                    | 90 (70.3)                             |
| MIVI (Q3, Q4, Q5, Q6)              | None                                    | 0 (0)                                 |
| Sofia (5FR, PLUS)                  | None                                    | 20 (15.6)                             |
| Others                             | None                                    | 10 (7.8)                              |
|                                    |                                         |                                       |
| <b>Stent retriever</b>             |                                         |                                       |
| Aperio                             | 6 (2.2)                                 | 15 (11.7)                             |
| Catch                              | 34 (12.5)                               | 29 (22.7)                             |
| Embotrap                           | 25 (9.2)                                | 3 (2.3)                               |
| Neva                               | 6 (2.2)                                 | 2 (1.6)                               |
| Solitaire                          | 148 (54.2)                              | 14 (10.9)                             |
| Trevo                              | 51 (18.7)                               | 58 (45.3)                             |
| Others                             | 3 (1.1)                                 | 7 (5.5)                               |
|                                    |                                         |                                       |
| <b>Diameter of stent retriever</b> |                                         |                                       |
| 3-3.5                              | 2 (0.8)                                 | 0 (0)                                 |
| 4-4.5                              | 139 (50.9)                              | 86 (67.5)                             |
| ≥5                                 | 132 (48.3)                              | 42 (32.5)                             |
|                                    |                                         |                                       |
| <b>Length of stent retriever</b>   |                                         |                                       |
| ≤ 20                               | 71 (26.3)                               | 4 (2.5)                               |
| 21-30                              | 66 (24.1)                               | 68 (54.1)                             |
| 31-40                              | 123 (44.8)                              | 39 (30.3)                             |
| > 40                               | 13 (4.8)                                | 17 (13.1)                             |

Supplemental Table 2. Devices: type and size.

Supplemental Figure 1

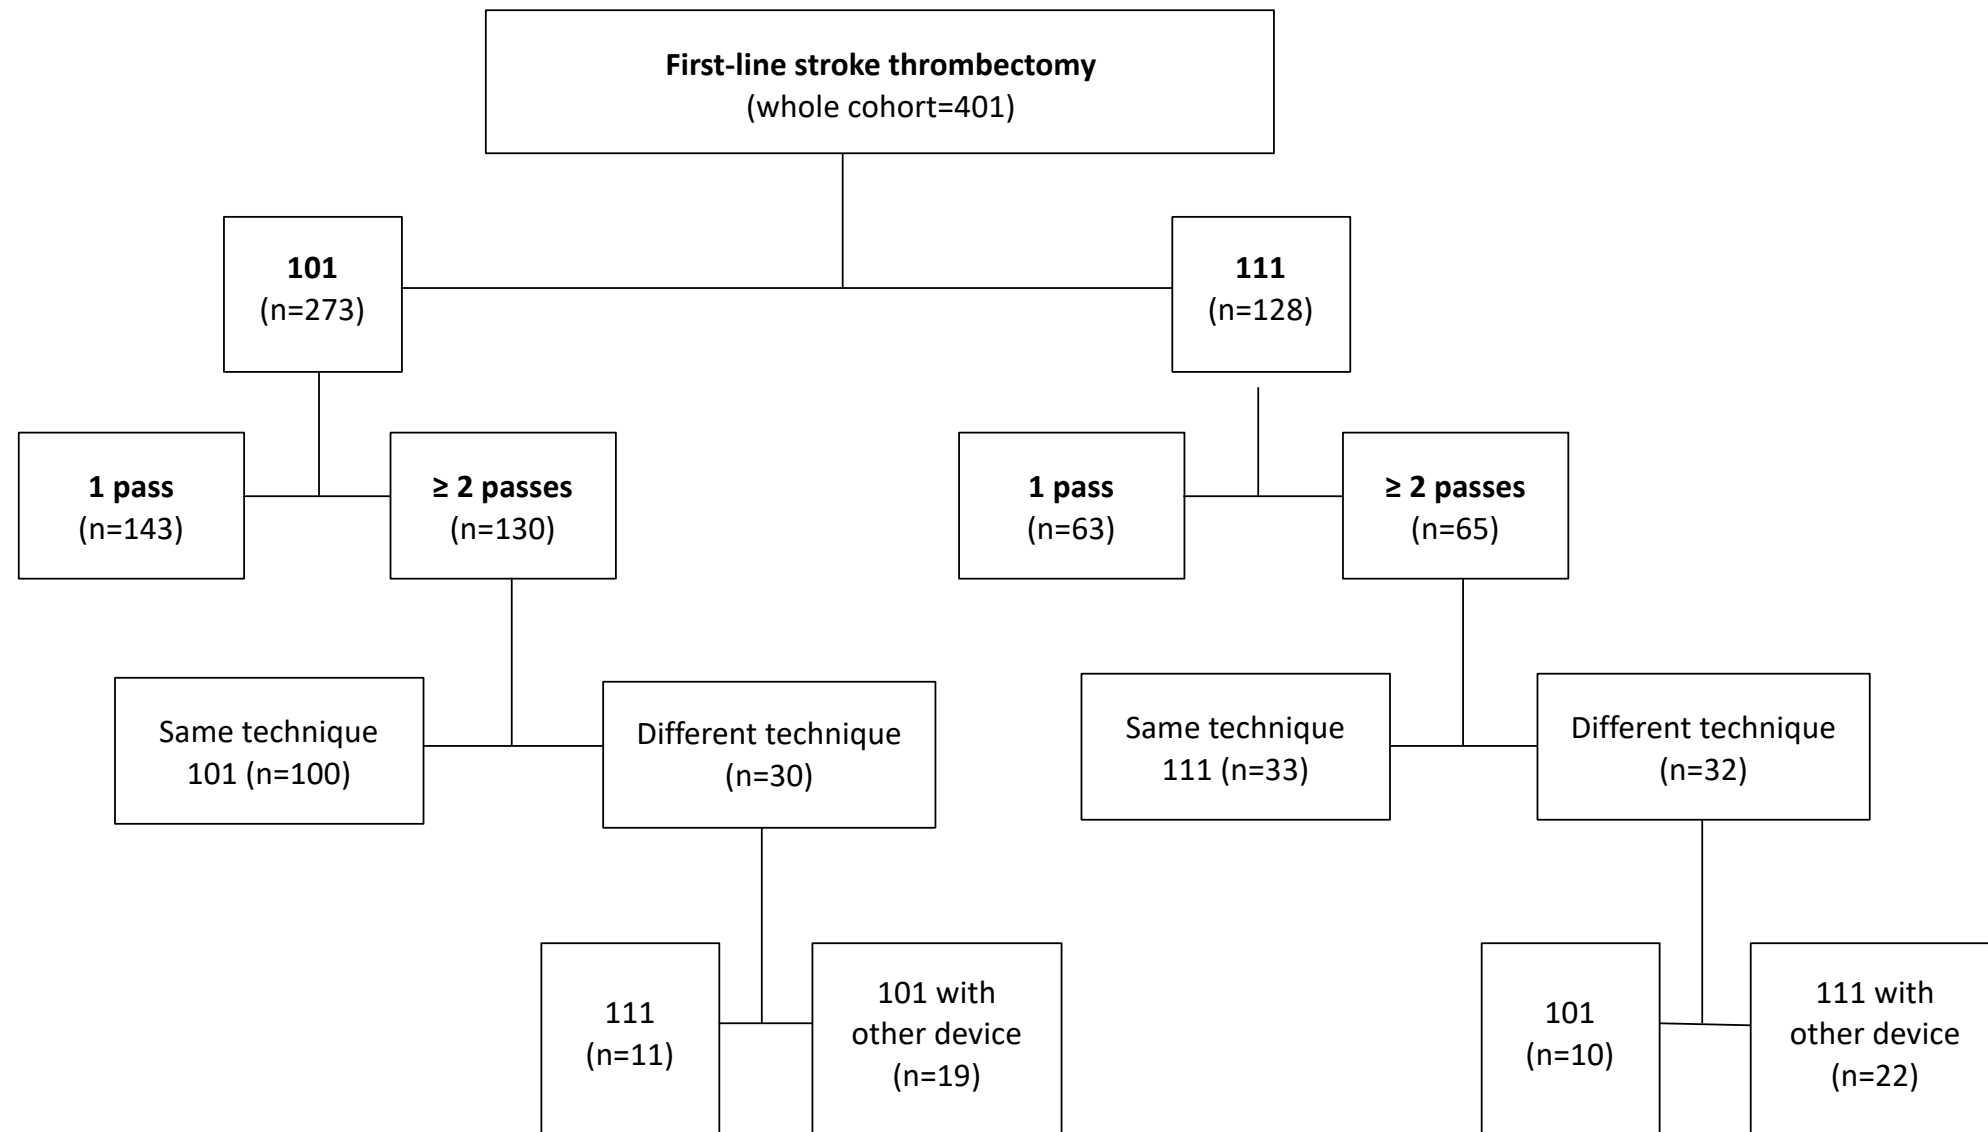

Supplemental Figure 1. Diagram showing cross-over
